# Supplementary material for: Pine Defensive Monoterpene α-Pinene Influences the Feeding Behavior of Dendroctonus valens and Its Gut Bacterial Community Structure
Source: MDPI journal article supplement (doi:10.3390/ijms17111734), 2016-11-01
Supplement: s1 [file s1]

# Supplementary Materials: Pine Defensive Monoterpene $\alpha$ -Pinene Influences the Feeding Behavior of *Dendroctonus valens* and Its Gut Bacterial Community Structure

Letian Xu, Zhanghong Shi, Bo Wang, Min Lu and Jianghua Sun

**Table S1.** Results of ANOSIM comparing of all bacterial communities. \*  $p < 0.05$ .

| Treatments                    | 0 mg/mL $\alpha$ -Pinene 6 h | 0 mg/mL $\alpha$ -Pinene 48 h | 9 mg/mL $\alpha$ -Pinene 6 h |
|-------------------------------|------------------------------|-------------------------------|------------------------------|
| 0 mg/mL $\alpha$ -pinene 6 h  |                              |                               |                              |
| 0 mg/mL $\alpha$ -pinene 48 h | 0.491                        |                               |                              |
| 9 mg/mL $\alpha$ -pinene 6 h  | 0.021 *                      | 0.004 *                       |                              |
| 9 mg/mL $\alpha$ -pinene 48 h | 0.242                        | 0.452                         | 0.001 *                      |
